1 **Microbiota Accessible Carbohydrates Facilitate Clearance of *Clostridium difficile***

2

3 Andrew J Hryckowian<sup>1</sup>, William Van Treuren<sup>1</sup>, Samuel A Smits<sup>1</sup>, Nicole M Davis<sup>1</sup>,

4 Jackson O Gardner<sup>1</sup>, Donna M Bouley<sup>2</sup>, Justin L Sonnenburg<sup>1\*</sup>

5

6 <sup>1</sup>Stanford University School of Medicine, Department of Microbiology and Immunology,

7 Stanford, CA; <sup>2</sup>Stanford University School of Medicine, Department of Comparative

8 Medicine, Stanford, CA

9

10 \*Corresponding Author, [jsonnenburg@stanford.edu](mailto:jsonnenburg@stanford.edu)

11

12

13

14

15

16

17

18

19

20

21

22

23

24

25

26

27

28

29

30

31

32

33

34

35

36

37

38

39

40 *Clostridium difficile* (*Cd*) is an opportunistic diarrheal pathogen and *Cd* infection  
41 (CDI) represents a major healthcare concern, causing an estimated 15,000 deaths per  
42 year in the United States alone<sup>1</sup>. Several enteric pathogens, including *Cd*, leverage  
43 inflammation and the accompanying microbial dysbiosis to thrive in the distal gut<sup>2,3</sup>.  
44 Although diet is among the most powerful available tools for affecting the health of  
45 humans and their relationship with their microbiota, investigation into the effects of diet  
46 on CDI has been limited. Here, we show in mice that the consumption of microbiota  
47 accessible carbohydrates (MACs) found in dietary plant polysaccharides has a  
48 significant impact on CDI. Specifically, using a murine model of antibiotic-induced CDI  
49 that typically resolves within 12 days of infection, we demonstrate that MAC-deficient  
50 diets perpetuate CDI. We show that *Cd* can be cleared through the addition of either a  
51 diet containing a complex mixture of MACs or a simplified diet containing inulin as the  
52 sole MAC source. We show that switches between these dietary conditions are  
53 coincident with changes to microbiota membership, its metabolic output and *Cd*-  
54 mediated inflammation. Together, our data demonstrate the outgrowth of MAC-utilizing  
55 taxa and the associated end products of MAC metabolism, namely the short chain fatty  
56 acids (SCFAs) acetate, propionate, and butyrate, are associated with decreased *Cd*  
57 fitness despite increased toxin production in the gut. Our findings, when placed into the  
58 context of the known fiber deficiencies of a human Western diet, suggest utility in  
59 microbiota-informed MAC-centric dietary strategies for the mitigation of CDI and other  
60 gastrointestinal infectious diseases.

61 The onset of CDI is typically associated with antibiotic-mediated dysbiosis, yet  
62 22% of individuals with community acquired CDI have no recent history of antibiotic  
63 use<sup>4</sup>. The use of proton pump inhibitors, recent hospitalization, impaired immune  
64 function, advanced age, and diet may also provide dysbiotic conditions conducive to *Cd*  
65 fitness in the gut<sup>5,6</sup>. We and others previously demonstrated that direct microbiota-*Cd*

66 metabolic interactions are critical determinants of *Cd* fitness in the distal gut<sup>7-9</sup> and that  
67 the absence of dietary MACs leads to the expression of inflammatory markers by the  
68 host colonic epithelium<sup>10</sup>. One hypothesis is that MACs may positively affect CDI  
69 outcome by favoring a diverse microbiota<sup>11,12</sup>. Additional *in vitro* work suggested that  
70 MAC-centric metabolic interactions may play a role in reducing the fitness of *Cd* in the  
71 gut<sup>13-15</sup>, leading us to hypothesize that a MAC-deficient diet reinforces a *Cd*-mediated  
72 inflammatory state.

73 We used an experimental model of CDI in ex-germ-free Swiss-Webster mice  
74 colonized with the microbiota of a healthy human donor (See Methods). These  
75 humanized mice were fed a diet containing a complex mixture of MACs (MAC<sup>+</sup>), or two  
76 diets that differ substantially in fat content but are both MAC-deficient (MD) (**Fig. 1a**; see  
77 Methods for details of diet compositions). Groups of mice fed either MD diet show  
78 persistent CDI while mice fed the MAC<sup>+</sup> diet clear the pathogen below detection within  
79 10 days of infection. After 36 days of persistent infection in mice fed the MD diets, a  
80 dietary shift to the MAC<sup>+</sup> diet results in clearance below detection within 9 days (**Fig. 1a**).  
81 This MAC<sup>+</sup> diet-mediated CDI clearance is also observed in conventional Swiss-Webster  
82 mice, in ex-germ-free Swiss-Webster mice colonized with a conventional Swiss-Webster  
83 mouse microbiota and in conventional C57BL/6 mice (**Fig. S1**), demonstrating that MAC-  
84 dependent CDI clearance is not confined to a specific microbiota or host genotype.

85 To enumerate gut-resident microbes that might participate in MAC-dependent  
86 CDI clearance, we sequenced 16S rRNA amplicons from the feces of humanized mice  
87 (**Fig. 1a**). The presence of dietary MACs and treatment with antibiotics affected both  
88 alpha and beta diversity of operational taxonomic units (OTUs) in the gut microbiota  
89 (**Figs. 1b-d, S2, S3**). Two principle coordinates could explain 48% of the variance in  
90 weighted UniFrac distances between samples, allowing us to visualize changes to  
91 overall community composition over time. We traced changes in the composition of the

92 microbiota over time and to highlight the composition of the microbiota in the context of  
93 CDI, a log-fold contour plot was drawn to illustrate burdens of *Cd* that correspond to  
94 these samples (see **Fig. S4** for further explanation of these “contoured PCoA” [cPCoA]  
95 plots).

96 Following clindamycin treatment, the microbiota of all mice is remodeled to a *Cd*-  
97 permissive state (**Figs. 1b-d**, dotted lines; **Fig. S3**). After inoculation with *Cd*, the  
98 microbiota of MAC<sup>+</sup> fed mice changes significantly, and as CDI clearance occurs, the  
99 community returns to resemble the pre-infection state (**Figs. 1b, S3a**), illustrating  
100 compositional resilience of the microbiota under the MAC<sup>+</sup> *Cd* non-permissive dietary  
101 condition. The microbiota of mice fed the MD diets also undergoes significant changes  
102 during experimental CDI, however, during persistent infection, microbiota composition is  
103 similar to the pre-infection microbiota associated with dietary MAC-deficiency. Upon  
104 dietary intervention with MACs, the microbiota of these mice transitions to resemble the  
105 microbiota of mice fed the MAC<sup>+</sup> diet as they clear *Cd* (**Figs. 1c, 1d, S3b, S3c**). These  
106 data suggest that diet and antibiotic treatment are the dominant drivers of microbial  
107 communities that support or exclude *Cd* in our model. Furthermore, the similarities in the  
108 microbiota of uninfected and persistently infected mice fed the MD diets may be due to  
109 the metabolic and compositional constraints imposed by this dietary condition, which we  
110 hypothesize is supportive to *Cd* during infection.

111 Since limitation of dietary MACs is known to increase inflammation in the  
112 gastrointestinal tract<sup>10</sup>, we examined whether diet-induced inflammation impacted *Cd*  
113 during persistence. Humanized Swiss-Webster mice fed the MD1 diet were infected as  
114 in **Fig. 1a**, and after persistent CDI was established, were given the MAC<sup>+</sup> diet at 7 days  
115 post infection. At pre- and post-diet shift time points, histopathology of proximal colon  
116 tissue was evaluated. Inflammation was significantly increased in all infected mice  
117 relative to uninfected control mice fed the MAC<sup>+</sup> diet, as illustrated by inflammatory cell

118 infiltrates into the submucosa and lamina propria of the colon (**Figs. 2a, S5; Table S1**).  
119 Notably, inflammation is comparably elevated in both infected and uninfected mice fed  
120 the MD1 diet, consistent with the contribution of the MD diets to inflammation and *Cd*  
121 persistence. Inflammation is most pronounced in infected mice that underwent the MD1  
122 to MAC<sup>+</sup> diet shift (**Fig. 2a**), suggesting that *Cd* causes greater inflammation in  
123 gastrointestinal tracts that are non-permissive to *Cd* fitness.

124 We measured burdens of *Cd* and levels of a critical *Cd* virulence factor, the  
125 glycosylating toxin TcdB<sup>16</sup>, in feces during the shift from a permissive to a non-  
126 permissive environment, specifically at 0, 2, and 4 days post MD1 to MAC<sup>+</sup> diet shift.  
127 TcdB is detected during persistent infection, and toxin expression is further elevated at 2  
128 and 4 days after the shift to the clearance-mediating MAC<sup>+</sup> diet (**Fig. 2b**, 14.5-fold  
129 increase in cfu-normalized abundance from day 0 to day 2;  $p < 0.0001$  and 6.5-fold  
130 increase from day 0 to day 4;  $p = 0.0066$ ). Though cfu-normalized TcdB abundance is  
131 elevated after the diet shift, the overall abundance of TcdB decreases from day 2 to day  
132 4 post diet shift (**Fig. S6**, 2.4-fold,  $p = 0.0086$ ). This shows that toxin expression is  
133 elevated on a per-cell basis in the MAC<sup>+</sup> environment, however overall TcdB abundance  
134 scales with decreasing burdens of *Cd* after a diet shift. The expression of TcdAB in *Cd* is  
135 controlled by multiple inputs, such as nutrient availability, quorum sensing, and other  
136 environmental stresses<sup>17</sup>. Together, these data demonstrate that a lack of dietary MACs  
137 facilitates a level of inflammation permissive to *Cd* survival in the gut, enabling  
138 persistence despite lower levels of toxin expression by *Cd*. The change to the *Cd*-  
139 inhospitable MAC<sup>+</sup> dietary condition is characterized by increased toxin expression and  
140 concomitant elevated inflammation.

141 In a previous report, in mice that cleared CDI below the limit of detection, high-  
142 level *Cd* shedding could be re-initiated upon clindamycin treatment up to approximately  
143 12 weeks post FMT-mediated clearance<sup>3</sup>, consistent with mice harboring *Cd* in the

144 absence of disease and not having developed protective immunity. In our model of  
145 MAC-mediated clearance of CDI, the persistently infected state cannot be re-established  
146 by switching cleared mice to the MD1 diet. However, persistent infection can be re-  
147 established if mice are first switched to the MD1 diet and treated with clindamycin (**Fig.**  
148 **S7**).

149 Having shown that the MAC<sup>+</sup> diet, containing a complex and ill-defined mixture of  
150 MACs (see Methods), is successful in clearing CDI, we sought to decouple the effects of  
151 MACs from other components that differ between our MAC<sup>+</sup> and MD diets (e.g.  
152 phytonutrient<sup>18</sup> or protein<sup>12</sup> content). Humanized mice whose CDI was reactivated with  
153 clindamycin treatment as in Fig. S7 (**Fig. 3a**) and mice that were *Cd*-naïve (**Fig. S8**)  
154 recapitulate findings from our dietary intervention experiment in mice using a simplified  
155 diet based on the MD1 diet containing inulin as the sole MAC source. We also  
156 demonstrate that prophylactic inulin feeding (either 10% in the diet as above or 1% in the  
157 drinking water of mice fed the MD1 diet), results in dose-dependent effects on both the  
158 maximum *Cd* burden and on *Cd* clearance kinetics (**Fig. S9**). Taken together, like the  
159 complex MAC<sup>+</sup> diet, inulin feeding results in significant reductions of *Cd* burdens across  
160 experimental paradigms (**Figs. 3a, S8-S10**).

161 Notably, 2 of 16 mice given inulin-based dietary interventions failed to clear *Cd*  
162 below detection (**Fig. S8a**). However, TcdB is not detectable in these mice (or the MAC<sup>+</sup>-  
163 fed mice that cleared *Cd* below detection) at the endpoint of this experiment (**Fig. S8b**).  
164 Intuitively, CDI severity is correlated with fecal toxin level in adults<sup>19</sup>, ranging from  
165 asymptomatic carriage to fulminant colitis (up to 15% of healthy adults are  
166 asymptotically colonized with *Cd*<sup>20</sup>). However, *Cd* toxin levels are rarely quantified in  
167 current clinical diagnostic procedures<sup>21</sup>. This raises the possibility that MAC-mediated  
168 reduction of *Cd* burdens below a pathogenic threshold may be sufficient to mitigate  
169 disease in at-risk individuals.

170           Although the complex MAC<sup>+</sup> and the inulin containing diets both negatively  
171 impact the *in vivo* fitness of *Cd*, the overall community composition differs substantially  
172 between these two diets, as illustrated by a two-dimensional cPCoA subspace that  
173 explains 62% of the variation in the data (**Fig. 3b**) and the proportional abundance of  
174 taxa (**Figs. S11, S12**). Increased gut microbiota diversity is associated with resistance to  
175 a number of pathogens and is a hallmark of FMT-mediated CDI clearance<sup>9,22-24</sup>. We  
176 hypothesized the MAC rich diets might increase the diversity of the microbiota, thereby  
177 facilitating CDI clearance. Consistent with this hypothesis, the CDI clearance induced by  
178 the MAC<sup>+</sup> diet is correlated with an increase in alpha diversity of the gut microbiota  
179 ( $p < 0.0001$ ). However, alpha diversity does not increase when mice undergo inulin-  
180 mediated clearance, as measured by Shannon Diversity Index (**Figs. 3c, S13a**). We  
181 calculated the Gini Index, with higher scores indicating less evenness in community OTU  
182 composition. Community evenness is lowest in the inulin fed mice relative to mice fed  
183 either the MAC<sup>+</sup> or MD1 diet (**Fig. S13b**,  $p < 0.0001$ ), consistent with a limited number of  
184 taxa profiting directly from a single type of MAC<sup>25</sup>. In aggregate, we demonstrate that  
185 addition of a single MAC type (i.e. inulin) significantly reduces *Cd* burdens but that  
186 clearance does not depend upon an increase in microbiota diversity.

187           Despite these wholesale differences in community composition and alpha  
188 diversity, we pursued two of several possibilities: (1) a common subset of OTUs  
189 facilitates clearance across dietary interventions or (2) diet-specific but functionally  
190 similar OTUs within dietary conditions facilitate clearance. To identify taxonomic features  
191 that are predictive of *Cd* presence within or across dietary conditions or that discriminate  
192 between dietary conditions utilized in this study (**Table S2**, fields 'Plus\_minus\_Cd' and  
193 'Current\_diet,' respectively), we performed supervised (random forests) and  
194 unsupervised (non-parametric tests for differential abundance) analyses on OTUs  
195 identified in this study. These methods gave highly similar results: all of the features

196 identified by supervised analysis as the most discriminating between *Cd* infection state  
197 or diet for each comparison group (n=15 for each classifier) were also identified by  
198 unsupervised analysis (Bonferroni corrected  $p < 0.05$ , **Table S3**). The correlation between  
199 these important features and *Cd* burdens was further explored by Spearman correlation  
200 analyses, refining a list of high-confidence taxa that are predictive of *Cd* burdens  
201 (Spearman  $\rho$  with Bonferroni corrected  $p < 0.05$ , **Table S4**). Notably, several taxa are  
202 significantly (anti)correlated with *Cd* burdens regardless of diet, suggesting that common  
203 microbial signatures may underlie permissive and non-permissive states (**Table S4**).  
204 Among these, features corresponding to *Parabacteroides*, Lachnospiraceae, and  
205 Erysipelotrichaceae are significantly correlated with *Cd* abundance regardless of diet.  
206 Our observed correlation between *Parabacteroides* and levels of *Cd* is consistent with  
207 previous observations that members of this genus are consistently found in *Cd*  
208 “supershedder” mice<sup>26</sup>. In humans, Erysipelotrichaceae and some Lachnospiraceae are  
209 enriched in individuals with CDI compared to nondiarrheal controls<sup>27</sup>. Despite these  
210 commonalities among dietary conditions, the majority of the features identified in **Table**  
211 **S4** are only (anti)correlated with *Cd* in a subset of diets, supporting previous work from  
212 Schubert and colleagues that multiple distinct context-dependent communities, rather  
213 than core *Cd*-(un)supportive communities, are important for determining CDI status<sup>28</sup>.  
214 Others have demonstrated that metabolites, rather than microbes, are able to  
215 differentiate CDI status in humans<sup>29</sup> and that differences in antibiotic exposure can  
216 change the landscape of nutrients available to *Cd* during murine model CDI<sup>30</sup>. We  
217 therefore hypothesized that diet creates metabolic landscapes that are either supportive  
218 or unsupportive of *Cd*, and that the identification and manipulation of metabolites that  
219 characterize environments that are unsupportive of CDI will open new therapeutic  
220 avenues to mitigating CDI and other gastrointestinal infectious diseases.



221 Therefore, we pursued whether the inulin and MAC<sup>+</sup>-mediated clearance  
222 conditions could be differentiated from the permissive condition on a molecular basis  
223 that is relevant to MAC metabolism. We measured the major metabolic end products of  
224 MAC metabolism (the SCFAs acetate, propionate, and butyrate) in cecal contents of  
225 mice shown in **Fig. S8** that were fed the MAC<sup>+</sup>, inulin, and MD1 diets. Acetate and  
226 butyrate are both elevated in the ceca of mice fed MAC<sup>+</sup> and inulin diets relative to those  
227 fed the MD1 diet, and propionate is elevated in the ceca of MAC<sup>+</sup>-fed mice relative to  
228 those fed the MD1 or inulin diets (**Fig. 4a**). We demonstrate that acetate, propionate,  
229 and butyrate have concentration-dependent negative effects on *Cd* growth, as measured  
230 by differences in doubling time (**Fig. 4b**). These findings using *Cd* strain 630 support  
231 previous findings that these SCFAs inhibit growth of four non-630 strains at  
232 concentrations as low as 20 mM<sup>15</sup>.

233 Given these findings, we hypothesize that dietary MACs negatively affect the  
234 fitness of *Cd* in two interrelated ways. First, MACs drive privileged outgrowth of MAC-  
235 utilizing members of the microbiota (e.g. *Bacteroides* spp., see **Table S3b**). Second, the  
236 SCFAs that result from MAC metabolism negatively affect the fitness of *Cd*, which could  
237 be due to possibly due to the buildup of endproducts of key metabolic pathways, such as  
238 reductive acetogenesis and butyrogenesis<sup>8,31</sup>.

239 Butyrate was previously shown to increase *Cd* toxin expression in *Cd* strain VPI  
240 10463 in vitro<sup>32</sup>. Here, we demonstrate that acetate, propionate, and butyrate have  
241 concentration-dependent positive effects on TcdB expression in *Cd* strain 630 in vitro  
242 (**Fig. 4c**). Our findings are consistent with a model where SCFAs serve as a signal to *Cd*  
243 that the gut has become inhospitable. Whether SCFA-dependent *Cd*-mediated  
244 inflammation leads to the exclusion of inflammation-sensitive competitors or to the  
245 creation of privileged nutrients, analogous to strategies delineated for the enteric  
246 pathogen *Salmonella* Typhimurium, remain to be determined<sup>33</sup>. Importantly, in the

247 murine model described herein, the negative effects on *Cd* fitness engendered by the  
248 sustained consumption of MAC-rich diets override the ability of *Cd* to maintain or regain  
249 its niche in the gastrointestinal tract.

250 To date, microbiota-centric therapies for CDI, such as fecal microbiota transplant  
251 and probiotic administration, have focused on the introduction of exogenous organisms  
252 whose functionalities exclude *Cd* from the community. Our work shows that dietary  
253 intervention supports microbial communities that exclude *Cd* without the requirement for  
254 microbe introduction. Despite inter-experiment and inter-animal variations in clearance  
255 kinetics (**Fig. S10**), the effect is highly reproducible. Clearance kinetics may be further  
256 affected by host genetics, initial microbiota composition, or overall dietary MAC  
257 concentration/composition. Despite the individuality in the gut microbiota of patients with  
258 CDI, there is a consistent metabolic response that underlies CDI across individuals<sup>29</sup>. In  
259 light of observations that MACs profoundly alter the composition and function of the  
260 microbiota and host physiology<sup>34,35</sup>, our findings raise the possibility that SCFAs, which  
261 are not easily measured in current shotgun metabolomics pipelines, are a critical part of  
262 the metabolic landscapes tied to CDI status across individuals. Advances in measuring  
263 these key reporters of community metabolism in the fecal matrix, or more proximally in  
264 the colon of humans will greatly advance understanding how diet shapes gut ecology.

265 Notably, two independent human trials have shown cooked green bananas (rich  
266 in MACs as evident by elevated SCFAs in the stool of treated patients) aid host recovery  
267 from another enteric pathogen, *Shigella*<sup>36,37</sup>. More recently, it was shown that a MAC-  
268 deficient diet leads to microbiota-dependent mucus degradation and attachment-  
269 dependent lethal colitis by the murine pathogen, *Citrobacter rodentium*<sup>38</sup>. Taken  
270 together, these observations suggest that further dissection of MAC-by-microbiota  
271 pathogen clearance mechanisms will be broadly applicable to many gastrointestinal  
272 infectious diseases. Our work provides evidence that dietary manipulation of the

273 metabolic networks of the intestinal tract offer a new lever to influence *Cd* and other  
274 gastrointestinal pathogens. These findings reveal an immediate need for simple,  
275 inexpensive, and safe diet-focused studies in appropriate human cohorts.

276

## 277 **Methods**

### 278 **Media and bacterial growth conditions**

279 Frozen stocks of *Clostridium difficile* (*Cd*) strain 630<sup>39</sup> were maintained under  
280 anaerobic conditions in septum-topped vials. *Cd* 630 was routinely cultured on CDMN  
281 agar, composed of *Cd* agar base (Oxoid) supplemented with 7% defibrinated horse  
282 blood (Lampire Biological Laboratories), 32 mg/L moxalactam (Santa Cruz  
283 Biotechnology), and 12 mg/L norfloxacin (Sigma-Aldrich) in an anaerobic chamber at 37°  
284 (Coy). After 16-24 hours of growth, a single colony was picked into 5 mL of pre-reduced  
285 Reinforced Clostridial medium (RCM, Oxoid) and grown for 16 hours. This 16-hour  
286 culture was used as the inoculum for murine model CDI, below.

287 For in vitro growth experiments, *Cd* 630 was cultured on CDMN as above. Single  
288 colonies were picked into pre-reduced *Cd* minimal medium (CDMM) without glucose, as  
289 described previously<sup>40</sup>. After 16 hours of growth, subcultures were prepared at a 1:200  
290 dilution in pre-reduced CDMM supplemented with 0, 10, or 30 mM of sodium acetate  
291 (Fisher), sodium propionate (Sigma Aldrich), sodium butyrate (Sigma Aldrich), or sodium  
292 chloride (EMD Millipore) in sterile polystyrene 96 well tissue culture plates with low  
293 evaporation lids (Falcon). To further minimize evaporation of culture media during  
294 growth, the 36 wells along the perimeter of the 96 well plates were filled with water  
295 rather than culture. Cultures were grown anaerobically as above in a BioTek Powerwave  
296 plate reader and at 15-minute intervals, the plate was shaken on the 'slow' setting for 1  
297 minute and the optical density (OD<sub>600</sub>) of the cultures was measured and recorded using

298 Gen5 software (version 1.11.5). After 24 hours of growth, culture supernatants were  
299 collected after centrifugation for 5 minutes at 2,500 x g and stored at -20°C.

300

### 301 **Murine model CDI**

302 All animal studies were conducted in strict accordance with the Stanford  
303 University Institutional Animal Care and Use Committee (IACUC) guidelines. Murine  
304 model CDI was performed on age- and sex-matched mice between 8 and 17 weeks of  
305 age, possessing one of three gut microbiota colonization states: (1) Humanized Swiss-  
306 Webster mice: Germ free mice (SWGf, Taconic; bred in house) were inoculated with a  
307 fecal sample obtained from a healthy anonymous donor, as used in previous studies  
308 from our laboratory<sup>41,42</sup>, (2) Conventionally-reared Swiss-Webster mice (SWRF, Taconic;  
309 bred in house); or C57BL/6 mice (B6EF, Taconic; experiments conducted on animals  
310 acquired directly from vendor), and (3) Conventionalized mice: Germ free Swiss-  
311 Webster mice were inoculated with a fecal sample obtained from SWRF mice. The gut  
312 microbial communities of the humanized and conventionalized mice were allowed to  
313 engraft for at least 4 weeks, a period of time sufficient for community equilibration<sup>43</sup>.

314 To initiate CDI, mice were given a single 1mg dose of clindamycin by oral gavage  
315 (200 µL of a 5 mg/mL solution) and were infected 24 hours later with 200 µL of overnight  
316 culture grown in RCM (approximately  $1.5 \times 10^7$  cfu/mL) or mock infected with 200 µL filter  
317 sterilized PBS. To reactivate CDI in mice that had cleared the infection below detection,  
318 mice were given a single dose of clindamycin by oral gavage as above.

319 Feces were collected from mice directly into microcentrifuge tubes and placed on  
320 ice. To monitor *Cd* burdens in feces, 1 µL of each fecal sample was resuspended in PBS  
321 to a final volume of 200 µL, 10-fold serial dilutions of fecal slurries (through  $10^{-3}$ -fold)  
322 were prepared in 96-well plates. For each sample, duplicate 10 µL aliquots of each  
323 dilution were spread onto CDMN agar. After 16-24 hours of anaerobic growth at 37°C

324 colonies were enumerated in duplicate spots were averaged to give cfu values. The limit  
325 of detection of this plating assay is  $2 \times 10^4$  cfu/mL feces. *Cd* was undetectable in all mice  
326 prior to inoculation with *Cd* (**Figs. 1A, S1, S8-S10**) and in all mice that were mock  
327 infected with PBS (**Fig. S8**), supporting that the animals used in this work were not pre-  
328 colonized with *Cd* (e.g. *Cd* LEM1, as seen by Etienne-Mesmin and colleagues<sup>44</sup>). After  
329 serial dilution of fecal samples, the remaining amounts of fecal samples were  
330 immediately frozen at  $-80^\circ\text{C}$  until needed for 16S rRNA analysis and measurement of  
331 TcdB via ELISA, below. It was not possible to blind researchers to infection or dietary  
332 status of the animals.

333

#### 334 **Mouse diets**

335 Mice were fed one of four diets in this study ad libitum: (1) a diet containing a  
336 complex mixture of MACs (MAC<sup>+</sup>, Purina LabDiet 5010); (2) a custom MAC-deficient  
337 diet<sup>45</sup> [MD1, 68% glucose (w/v), 18% protein (w/v), and 7% fat (w/v) (Bio-Serv); (3) a  
338 commercially available MAC-deficient diet [MD2, 34% sucrose (w/v), 17% protein (w/v),  
339 21% fat (w/v); Harlan TD.88137], or (4) a custom diet containing inulin as the sole MAC  
340 source<sup>45</sup> [58% glucose (w/v); 10% inulin (w/v) [Beneo-Orafti group; OraftiHP]; 18%  
341 protein (w/v), and 7% fat (w/v) (Bio-Serv)]. Where applicable, the drinking water of mice  
342 fed the MD1 diet was supplemented with 1% inulin (w/v) [Beneo-Orafti group; OraftiHP].  
343 Because mice consume approximately 5 grams of food per day and 5 mL of water per  
344 day<sup>46</sup>, water with 1% inulin gives an approximate 10-fold reduction in inulin consumed  
345 relative to the 10% inulin diet. Groups of mice were randomly assigned to dietary  
346 conditions.

347

#### 348 **Histology and histopathological scoring**

349 Proximal colon sections harvested for histopathologic analyses were fixed in 10%  
350 buffered neutral formalin and routinely processed for paraffin embedding, sectioned at 4  
351 microns, mounted on glass slides and stained with hematoxylin and eosin (Histo-tec  
352 Laboratory, Hayward, CA). Analyses were performed by a board certified veterinary  
353 pathologist, using a semiquantitative scoring system<sup>47</sup> that evaluated distribution and  
354 severity of cellular infiltrates (inflammation) using a severity score of 0 to 5 (0 = no  
355 significant lesion, 1 = minimal, 2 = mild, 3 = moderate, 4 = marked, 5 = severe).

356

### 357 **Quantification of *C. difficile* toxin TcdB**

358 Levels of TcdB in feces and culture supernatants were measured using the  
359 “Separate detection of *C. difficile* toxins A and B” kit (TGC Biomics) according to the  
360 manufacturer’s instructions. For each fecal sample, toxin abundance was normalized by  
361 the number colony forming units, as determined by selective culture on CDMN agar  
362 (above), for each sample; “Normalized TcdB Abundance in Feces” = [(x ng toxin) / (y cfu  
363 *C. difficile* mL<sup>-1</sup> feces)] and is reported in **Fig. 2b**. Non-normalized TcdB abundance in  
364 mouse feces is reported in **Fig. S6**. For culture supernatants, toxin abundance was  
365 normalized by the final OD<sub>600</sub> of the culture and “Normalized TcdB Abundance in Culture  
366 Supernatant” = [(x ng toxin) / (y OD600)] and is reported in **Fig. 4c**.

367

### 368 **16S rRNA amplicon sequencing and OTU picking methods**

369 Total DNA was extracted from frozen fecal material using the PowerSoil DNA  
370 Isolation Kit (MoBio) or the Powersoil-htp 96 well DNA isolation kit (MoBio). Barcoded  
371 primers were used to amplify the V3-V4 region of the 16S rRNA gene from extracted  
372 bacterial DNA using primers 515f and 806rB via PCR<sup>48</sup>. Following amplicon cleanup  
373 using the UltraClean PCR Clean-Up Kit (MoBio) and quantification using the high  
374 sensitivity Quant-iT dsDNA Assay Kit (Thermo Fisher). Amplicons were pooled to an

375 equimolar ratio. 16S rRNA amplicons from 3 mouse experiments were sequenced in 3  
376 different paired-end Illumina MiSeq runs, with each experiment occurring on a separate  
377 run. The sample split/run corresponds to the field 'Experiment' in **Table S2**.

378 For exact commands executed for the 16S rRNA-based bioinformatics analysis,  
379 please see **Code S1**, an ipython notebook that records commands and code used. Runs  
380 were demultiplexed independently due to some non-unique barcodes, and then  
381 concatenated prior to OTU picking using 'split\_libraries\_fastq.py' with default quality  
382 parameters in QIIME 1.9.1<sup>49</sup>. Open reference OTU picking was conducted with default  
383 parameters using the QIIME script 'pick\_open\_reference\_otus.py' (with default clustering  
384 algorithm UCLUST<sup>50</sup>) on the 24,582,127 reads that passed quality filtering. OTUs whose  
385 representative sequence failed to align to the Greengenes reference alignment with at  
386 85% identity using PyNAST were discarded<sup>51,52</sup>.

387 We removed OTUs occurring in at least 10 samples, and/or having less than 26  
388 counts in the entire dataset. This filtering reduced the number of OTUs by 95.04%  
389 (211,884 to 10,504) but removed only 5.2% of the feature-mass (23,293,178 to  
390 22,078,743). This type of filtering removes a vast number of features that are likely  
391 artefacts, boosts power by reducing false discovery penalties, and concentrates analysis  
392 on biologically meaningful features. We rarefied our data to correct for differences  
393 sequencing depth. To ensure our results were not artefacts of rarefaction depth we  
394 conducted analyses at multiple rarefaction levels and our conclusions were not changed.  
395 We use OTU tables rarefied to 7,000 in this study, facilitating inter-run comparisons.

396

### 397 **Supervised learning**

398 Using the 'supervised\_learning.py' script from QIIME 1.9.1, the random forests  
399 classification method (with 10-fold cross validation error estimation) was trained using an  
400 OTU table as prepared above in "16S sequencing and OTU picking methods." Presence

401 or absence of *Cd* in a fecal sample (as determined by selective culture) or current diet  
402 were used as the class label category, corresponding to the field 'Plus\_minus\_Cd' and  
403 'Current\_diet' of **Table S2**. The OTU table was modified for this analysis by querying  
404 each of the 11 *Cd* 630 rRNA sequences against a BLAST database built from the  
405 representative set of OTUs created during OTU picking (see "16S sequencing and OTU  
406 picking methods"), after which the OTUs that matched *Cd* 630 rRNA sequences (cutoff  
407 97% identity) were collapsed into a single *Cd* OTU,  
408 "k\_\_Bacteria;p\_\_Frimicutes;c\_\_Clostridia;o\_\_Clostridiales;f\_\_Peptostreptococcaceae;g\_  
409 \_\_Clostridioides;s\_\_putative\_difficile." See **Code S1** for the code used for this analysis.

410

#### 411 **Quantification of short chain fatty acids (SCFAs)**

412 Immediately following euthanasia, cecal contents were removed from mice  
413 described in **Fig. S8**, weighed, and flash frozen in liquid nitrogen. Cecal contents (70-  
414 150 mg) were suspended in a final volume of 600  $\mu$ l in ice-cold ultra pure water and  
415 blended with a pellet pestle (Kimble Chase) on ice. The cecal slurry was centrifuged at  
416 2,350 x g for 30 seconds at 4°C and 250  $\mu$ L of the supernatant was removed to a  
417 septum-topped glass vial and acidified with 20 $\mu$ L HPLC grade 37% HCl (Sigma Aldrich).  
418 Diethyl ether (500  $\mu$ L) was added to the acidified cecal supernatant to extract SCFAs.  
419 Samples were then vortexed at 4°C for 20 minutes on 'high' and then were centrifuged at  
420 1,000 x g for 3 minutes. The organic phase was removed into a fresh septum-topped vial  
421 and placed on ice. Then, a second extraction was performed with diethyl ether as above.  
422 The first and second extractions were combined for each sample and 250  $\mu$ L of this  
423 combined solution was added to a 300  $\mu$ L glass insert in a fresh glass septum-topped  
424 vial containing and the SCFAs were derivitized using 25  $\mu$ L N-tert-butyldimethylsilyl-N-  
425 methyltrifluoroacetamide (MTBSTFA; Sigma Aldrich) at 60°C for 30 minutes.



426           Analyses were carried out using an Agilent 7890/5975 single quadrupole GC/MS.  
427           Using a 7683B autosampler, 1  $\mu$ L split injections (1:100) were made onto a DB-5MSUI  
428           capillary column (30 m length, 0.25 mm ID, 0.25  $\mu$ m film thickness; Agilent) using helium  
429           as the carrier gas (1 mL/minute, constant flow mode). Inlet temperature was 200°C and  
430           transfer line temperature was 300°C. GC temperature was held at 60°C for 2 minutes,  
431           ramped at 40°C/min to 160°C, then ramped at 80°/min to 320°C and held for 2 minutes;  
432           total run time was 8.5 minutes. The mass spectrometer used electron ionization (70eV)  
433           and scan range was m/z 50-400, with a 3.75-minute solvent delay. Acetate, propionate,  
434           and butyrate standards (20mM, 2mM, 0.2mM, 0.02mM, 0mM) were acidified, extracted,  
435           and derivatized as above, were included in each run, and were used to generate  
436           standard curves to enable SCFA quantification.

437

#### 438 **Measurement of doubling time for in vitro growth experiments**

439           Raw OD<sub>600</sub> measurements of cultures grown in CDMM (see “Media and bacterial  
440           growth conditions,” above) were exported from Gen5 to MATLAB and analyzed using  
441           the growth\_curve\_analysis\_v2\_SCFA.m script and analyze\_growth\_curve\_SCFA.m  
442           function (**Code S2** and **Code S3**, respectively). Growth rates were determined for each  
443           culture by calculating the derivative of natural log-transformed OD<sub>600</sub> measurements with  
444           respect to time. Growth rate values at each time point were then smoothed using a  
445           moving average over 75-minute intervals to minimize artefacts due to noise in OD  
446           measurement data. To mitigate any remaining issues with noise in growth rate values,  
447           all growth rate curves were also inspected manually. Specifically, in cases where the  
448           analyze\_growth\_curve\_SCFA function selected an artefactual maximum growth rate, the  
449           largest local maximum that did not correspond to noise was manually assigned as the  
450           maximum growth rate. Doubling time was then computed by dividing the natural log of 2

451 by maximum growth rate. The investigator that conducted growth curve analysis was  
452 blinded to the experimental conditions in which growth curve data were obtained.

453

#### 454 **Statistical methods**

455 Alpha and beta diversity, correlations, and random forests were computed using  
456 QIIME ('alpha\_diversity\_through\_plots.py', 'beta\_diversity\_through\_plots.py',  
457 'observation\_metadata\_correlations.py', 'supervised\_learning.py'). Kruskal-Wallis,  
458 Mann-Whitey, Student's T, ANOVA, and D'Agostino-Pearson tests were performed  
459 using standard statistical analyses embedded in the Prism 7 software package  
460 (GraphPad Software Inc.). Spearman correlations were calculated in Python using **Code**  
461 **S1** under the heading 'feature correlations by diet'. Specific statistical tests are noted in  
462 figure legends or tables as applicable.

463

#### 464 **Data availability**

465 The 16S sequence data have been uploaded to Qiita (<http://qiita.ucsd.edu>; Study ID  
466 11347).

467

#### 468 **Code availability**

469 For custom code used in this study, see **Code S1-S3**.

470

#### 471 **Acknowledgements**

472 We thank Steven K. Higginbottom (Department of Microbiology and Immunology,  
473 Stanford) for expertise and technical assistance in all mouse experiments, Allis S. Chien  
474 (Stanford University Mass Spectrometry Facility) for developing the GC-MS parameters  
475 used in this study, and Carlos G. Gonzalez (Department of Chemical and Systems  
476 Biology, Stanford) for assistance with DNA extractions from mouse feces. This work was

477 funded by a grant from National Institutes of Health NIDDK (R01-DK085025 to J.L.S.),  
478 an NIH postdoctoral NRSA (5T32AI007328 to A.J.H.), a Stanford University School of  
479 Medicine Dean's Postdoctoral Fellowship (A.J.H.), NSF Graduate Research Fellowships  
480 (S.A.S, W.V.T - DGE-114747), an NIH predoctoral NRSA (5T32AI007328 to N.M.D.),  
481 and a Smith Stanford Graduate Fellowship (S.A.S.). J.L.S. received an Investigators in  
482 the Pathogenesis of Infectious Disease Award from the Burroughs Wellcome Fund.

483

#### 484 **Author Contributions**

485 A.J.H., N.M.D., and J.O.G. performed the experiments. D.M.B. conducted blinded  
486 scoring, imaging, and analysis of tissue sections. A.J.H., W.V.T., S.A.S., N.M.D.,  
487 D.M.B., and J.L.S. analyzed and interpreted data, designed experiments, and prepared  
488 display items. A.J.H. and J.L.S. wrote the paper. All authors edited the manuscript prior  
489 to submission.

490

#### 491 **Competing interests**

492 The authors declare no competing interests.

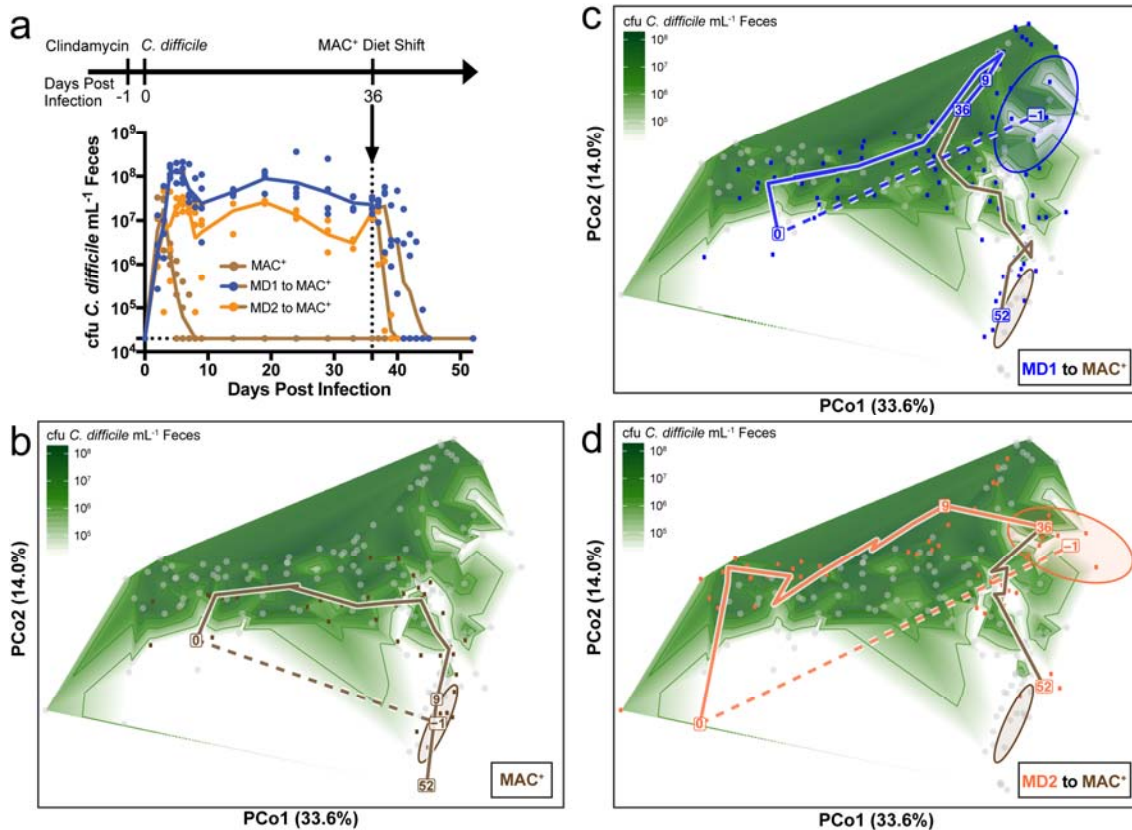

493

494 **Figure 1. Dietary MACs toggle the fitness of *Clostridium difficile* (*Cd*) in the gut**

495 **while engendering distinct microbiota states.** Humanized, age matched female

496 Swiss-Webster mice were maintained on a diet containing a complex mixture of MACs

497 (MAC<sup>+</sup>, n=4 mice) or on diets deficient in MACs (MD1, n=4 mice; and MD2, n=4 mice)

498 starting 8 days pre-infection. **(a)** All mice were subsequently subjected to murine model

499 CDI and were gavaged with clindamycin at 1 day before infection with *Cd*. At 36 days

500 post-infection, mice fed the MD diets were switched to the MAC<sup>+</sup> diet. Burdens of *Cd*

501 were monitored over time by selective culture, as described in Methods. One of the MD2

502 fed mice was moribund on D10 and was euthanized. Individual per-sample *Cd* burdens

503 are plotted and lines represent geometric mean burdens per time point. **(b-d)** Principal

504 coordinates analysis plots of Weighted UniFrac distances between microbiota samples

505 collected from these mice were prepared and overlaid with log-fold contour plots of *Cd*

506 burdens, as measured in panel A. Under all dietary conditions, clindamycin affects the

507 composition of the microbiota in all groups of mice from D-1 (annotated with ellipses  
508 representing 80% CI) to D0 (dotted lines), resulting in a dysbiotic state permissive to  
509 CDI. In each panel, a line is drawn through the centroid of the points for a given  
510 experiment day. **(c)** In mice fed the MAC<sup>+</sup> diet, the microbiota returns to resemble the  
511 pre-infection state as *Cd* clearance occurs. **(d, e)** In mice fed the MD1 and MD2 diets,  
512 respectively, CDI remains unresolved until dietary intervention with the MAC<sup>+</sup> diet at  
513 D36, which shifts the microbiota to resemble that of other MAC<sup>+</sup> fed mice as *Cd*  
514 clearance occurs (brown lines). Points are colored by the highlighted treatment group, or  
515 alternatively are retained as gray points for reference. See **Fig. S4** for further  
516 explanation on how to interpret the contoured PCoA (cPCoA) plots shown in panels b-d.  
517  
518  
519  
520  
521

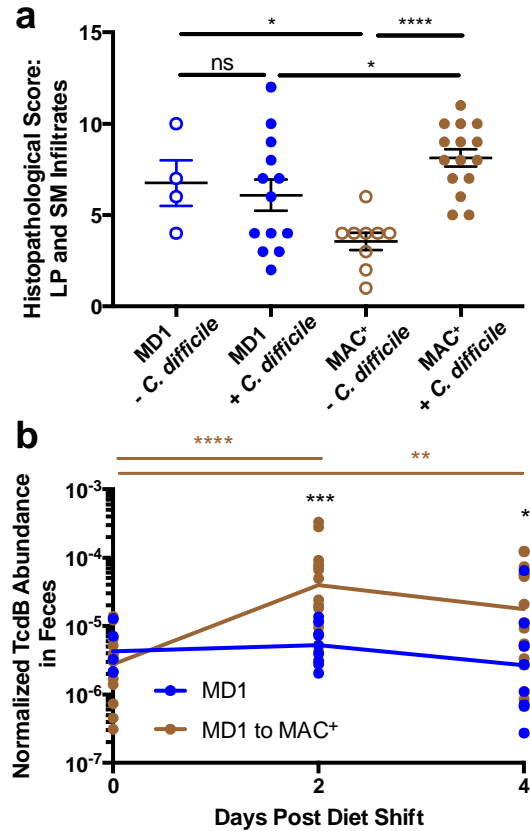

522

523 **Figure 2. Inflammation and Cd toxin expression are diet-dependent.** Age-matched,  
524 female, humanized Swiss-Webster mice were fed the MD1 diet, gavaged with  
525 clindamycin, and subsequently infected with Cd as in Fig. 1 or were mock infected with  
526 filter sterilized PBS. After 7 days of infection, mice were switched to a diet containing a  
527 complex mixture of MACs (MAC<sup>+</sup>) to induce clearance. **(a)** Mice were euthanized before  
528 and after diet change, at time points specified in Table S1. Histopathology was carried  
529 out on proximal colon tissue from these mice as described in Methods (n=4 for mock-  
530 infected mice fed the MD1 diet, n=9 for mock-infected mice fed the MAC<sup>+</sup> diet, n=13 for  
531 infected mice fed the MD1 diet, and n=15 for infected mice fed the MAC<sup>+</sup> diet). Statistical  
532 significance between groups was assessed by one-way ANOVA and Tukey's multiple  
533 comparison test (\*= p<0.05; \*\*\*\*=p<0.0001). **(b)** For infected mice where >5 mg fecal  
534 material could be collected (n=14, n=13, and n=13 for mice at 0, 2, and 4 days post MD1

535 to MAC<sup>+</sup> diet shift, and n=5, n=9, and n=9 at matched time points for mice that were  
536 maintained on the MD1 diet), levels of TcdB in the feces were measured and normalized  
537 to the burdens of *Cd* detected. Points represent normalized toxin abundance for  
538 individual fecal samples lines are drawn through the per-day per-diet geometric mean  
539 normalized toxin abundance. Statistical significance between relevant pairs of treatment  
540 groups was assessed by Mann-Whitney test (\*= p<0.05; \*\*= p<0.01; \*\*\*= p<0.001;  
541 \*\*\*\*=p<0.0001).

542

543

544

545

546

547

548

549

550

551

552

553

554

555

556

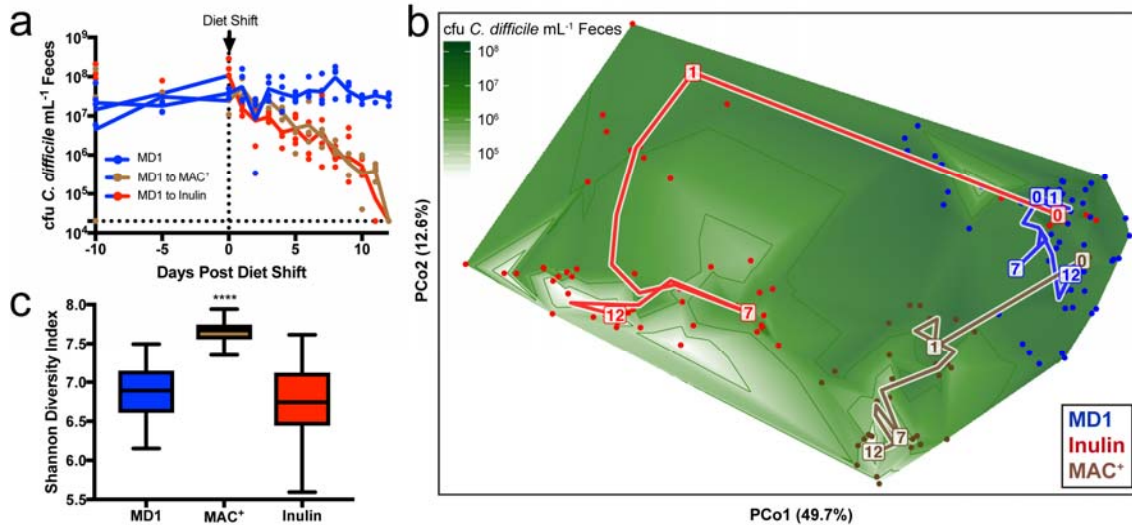

557

558 **Figure 3. A diet containing inulin as the sole MAC source recapitulates the CDI**  
559 **clearance phenotype without increasing microbial diversity.** Mice with persistent  
560 CDI were subjected to a dietary intervention of the complex MAC<sup>+</sup> diet (n=3), a diet  
561 containing inulin as the sole MAC source (n=4), or were maintained on the MD1 diet  
562 (n=4). **(a)** Burdens of *Cd* were monitored over time by selective culture as described in  
563 Methods. Individual per-sample *Cd* burdens are plotted and lines represent geometric  
564 mean burdens per time point. **(b)** Contoured PCoA (cPCoA) plot of weighted UniFrac  
565 distances between microbiota samples collected from these mice was prepared and  
566 overlaid with log-fold contour plots of *Cd* burdens, as measured in panel A. A line is  
567 drawn through the centroid of the points for a given experimental day. See **Fig. S4** for  
568 further explanation on how to interpret cPCoA plots. **(c)** Alpha diversity of communities  
569 was determined longitudinally for the microbiota of these mice by Shannon Diversity  
570 Index. Differences in *Cd* burdens and alpha diversity between dietary conditions was  
571 determined by collapsing all post-intervention time points (See **Fig. S13** for temporal  
572 differences in Shannon Diversity Index). Statistical significance was determined by  
573 Kruskal Wallis test with Dunn's multiple comparison test (\*\*\*\*= p<0.0001).

574



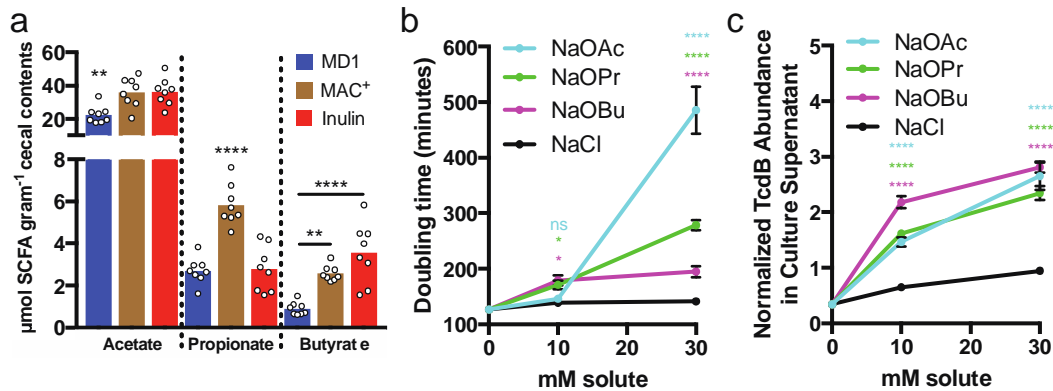

575

576 **Figure 4. Acetate, propionate, and butyrate are elevated in the ceca of mice fed**

577 **MACs, and affect growth and toxin production in *C. difficile*. (a)** The short chain

578 fatty acids acetate, propionate, and butyrate were measured in cecal contents of mice

579 (n=8 per dietary condition) fed the MD1, MAC<sup>+</sup>, and inulin containing diets (See **Fig S8**

580 for time points of sacrifice corresponding to measurements). Data points represent per

581 sample concentration of each SCFA and bars are drawn to represent the mean per-diet

582 SCFA concentration. Statistical significance was assessed by ordinary one-way ANOVA

583 and Tukey's multiple comparison test. (\*\*, p<0.01; \*\*\*\*, p<0.0001) **(b)** Doubling time was

584 calculated for *Cd* grown in CDMM supplemented with 0, 10, and 30 mM sodium acetate

585 (NaOAc), sodium propionate (NaOPr), sodium butyrate (NaOBu), or sodium chloride

586 (NaCl, sodium matched controls) as described in Methods. For each growth condition, at

587 least n=16 independent cultures were assessed. **(c)** TcdB was quantified in

588 supernatants from n=12 independent cultures from each growth condition as described

589 in Methods. Points represent mean values, error bars represent ±SEM (panels b-d).

590 Statistical significance (panels b-d) was assessed for each SCFA and sodium matched

591 controls at each concentration via Mann-Whitney test (ns, not significant; \*, p<0.05; \*\*\*\*,

592 p<0.0001).

593

594

595 **References**

- 596 1 Lessa, F. C., Winston, L. G. & McDonald, L. C. Burden of *Clostridium difficile*  
597 infection in the United States. *The New England Journal of Medicine* **372**, 2369-  
598 2370, doi:10.1056/NEJMc1505190 (2015).
- 599 2 Ferreyra, J. A., Ng, K. M. & Sonnenburg, J. L. The Enteric Two-Step: nutritional  
600 strategies of bacterial pathogens within the gut. *Cellular Microbiology* **16**, 993-  
601 1003, doi:10.1111/cmi.12300 (2014).
- 602 3 Lawley, T. D. *et al.* Antibiotic treatment of *Clostridium difficile* carrier mice triggers  
603 a supershedder state, spore-mediated transmission, and severe disease in  
604 immunocompromised hosts. *Infection and Immunity* **77**, 3661-3669,  
605 doi:10.1128/iai.00558-09 (2009).
- 606 4 Khanna, S. *et al.* The epidemiology of community-acquired *Clostridium difficile*  
607 infection: a population-based study. *The American Journal of Gastroenterology*  
608 **107**, 89-95, doi:10.1038/ajg.2011.398 (2012).
- 609 5 Johnson, S. & Gerding, D. N. *Clostridium difficile*-associated diarrhea. *Clinical*  
610 *Infectious Diseases* **26**, 1027-1034; quiz 1035-1026 (1998).
- 611 6 Bignardi, G. E. Risk factors for *Clostridium difficile* infection. *The Journal of*  
612 *Hospital Infection* **40**, 1-15 (1998).
- 613 7 Ng, K. M. *et al.* Microbiota-liberated host sugars facilitate post-antibiotic  
614 expansion of enteric pathogens. *Nature* **502**, 96-99, doi:10.1038/nature12503  
615 (2013).
- 616 8 Ferreyra, J. A. *et al.* Gut Microbiota-Produced Succinate Promotes *C. difficile*  
617 Infection after Antibiotic Treatment or Motility Disturbance. *Cell Host & Microbe*  
618 **16**, 770-777 (2014).
- 619 9 Buffie, C. G. *et al.* Precision microbiome reconstitution restores bile acid  
620 mediated resistance to *Clostridium difficile*. *Nature*, doi:10.1038/nature13828  
621 (2014).
- 622 10 Earle, K. A. *et al.* Quantitative Imaging of Gut Microbiota Spatial Organization.  
623 *Cell Host & Microbe* **18**, 478-488, doi:10.1016/j.chom.2015.09.002 (2015).
- 624 11 Iizuka, M. *et al.* Elemental diet modulates the growth of *Clostridium difficile* in the  
625 gut flora. *Alimentary Pharmacology & Therapeutics* **20 Suppl 1**, 151-157,  
626 doi:10.1111/j.1365-2036.2004.01969.x (2004).
- 627 12 Moore, J. H. *et al.* Defined Nutrient Diets Alter Susceptibility to *Clostridium*  
628 *difficile* Associated Disease in a Murine Model. *PloS One* **10**, e0131829,  
629 doi:10.1371/journal.pone.0131829 (2015).
- 630 13 Hopkins, M. J. & Macfarlane, G. T. Nondigestible oligosaccharides enhance  
631 bacterial colonization resistance against *Clostridium difficile* in vitro. *Applied and*  
632 *Environmental Microbiology* **69**, 1920-1927 (2003).
- 633 14 Valdes-Varela, L., Hernandez-Barranco, A. M., Ruas-Madiedo, P. & Gueimonde,  
634 M. Effect of Bifidobacterium upon *Clostridium difficile* Growth and Toxicity When  
635 Co-cultured in Different Prebiotic Substrates. *Frontiers in Microbiology* **7**, 738,  
636 doi:10.3389/fmicb.2016.00738 (2016).
- 637 15 Kondepudi, K. K., Ambalam, P., Nilsson, I., Wadstrom, T. & Ljungh, A. Prebiotic-  
638 non-digestible oligosaccharides preference of probiotic bifidobacteria and  
639 antimicrobial activity against *Clostridium difficile*. *Anaerobe* **18**, 489-497,  
640 doi:10.1016/j.anaerobe.2012.08.005 (2012).
- 641 16 Lyras, D. *et al.* Toxin B is essential for virulence of *Clostridium difficile*. *Nature*  
642 **458**, 1176-1179, doi:10.1038/nature07822 (2009).

- 643 17 Martin-Verstraete, I., Peltier, J. & Dupuy, B. The Regulatory Networks That  
644 Control *Clostridium difficile* Toxin Synthesis. *Toxins* **8**,  
645 doi:10.3390/toxins8050153 (2016).
- 646 18 Wlodarska, M., Willing, B. P., Bravo, D. M. & Finlay, B. B. Phytonutrient diet  
647 supplementation promotes beneficial Clostridia species and intestinal mucus  
648 secretion resulting in protection against enteric infection. *Scientific Reports* **5**,  
649 9253, doi:10.1038/srep09253 (2015).
- 650 19 Huang, B. *et al.* Real-time cellular analysis coupled with a specimen enrichment  
651 accurately detects and quantifies *Clostridium difficile* toxins in stool. *Journal of*  
652 *Clinical Microbiology* **52**, 1105-1111, doi:10.1128/jcm.02601-13 (2014).
- 653 20 Furuya-Kanamori, L. *et al.* Asymptomatic *Clostridium difficile* colonization:  
654 epidemiology and clinical implications. *BMC Infectious Diseases* **15**, 516,  
655 doi:10.1186/s12879-015-1258-4 (2015).
- 656 21 Pollock, N. R. Ultrasensitive Detection and Quantification of Toxins for Optimized  
657 Diagnosis of *Clostridium difficile* Infection. *Journal of Clinical Microbiology* **54**,  
658 259-264, doi:10.1128/jcm.02419-15 (2016).
- 659 22 Kampmann, C., Dicksved, J., Engstrand, L. & Rautelin, H. Composition of human  
660 faecal microbiota in resistance to *Campylobacter* infection. *Clin Microbiol Infect*  
661 **22**, 61 e61-68, doi:10.1016/j.cmi.2015.09.004 (2016).
- 662 23 Ferreira, R. B. *et al.* The intestinal microbiota plays a role in *Salmonella*-induced  
663 colitis independent of pathogen colonization. *PLoS One* **6**, e20338,  
664 doi:10.1371/journal.pone.0020338 (2011).
- 665 24 Seekatz, A. M. *et al.* Recovery of the gut microbiome following fecal microbiota  
666 transplantation. *mBio* **5**, e00893-00814, doi:10.1128/mBio.00893-14 (2014).
- 667 25 Walker, A. W. *et al.* Dominant and diet-responsive groups of bacteria within the  
668 human colonic microbiota. *The ISME journal* **5**, 220-230,  
669 doi:10.1038/ismej.2010.118 (2011).
- 670 26 Lawley, T. D. *et al.* Targeted restoration of the intestinal microbiota with a simple,  
671 defined bacteriotherapy resolves relapsing *Clostridium difficile* disease in mice.  
672 *PLoS Pathogens* **8**, e1002995, doi:10.1371/journal.ppat.1002995 (2012).
- 673 27 Schubert, A. M. *et al.* Microbiome data distinguish patients with *Clostridium*  
674 *difficile* infection and non-*C. difficile*-associated diarrhea from healthy controls.  
675 *mBio* **5**, e01021-01014, doi:10.1128/mBio.01021-14 (2014).
- 676 28 Schubert, A. M., Sinani, H. & Schloss, P. D. Antibiotic-Induced Alterations of the  
677 Murine Gut Microbiota and Subsequent Effects on Colonization Resistance  
678 against *Clostridium difficile*. *mBio* **6**, e00974, doi:10.1128/mBio.00974-15 (2015).
- 679 29 Rojo, D. *et al.* *Clostridium difficile* heterogeneously impacts intestinal community  
680 architecture but drives stable metabolome responses. *The ISME Journal* **9**, 2206-  
681 2220, doi:10.1038/ismej.2015.32 (2015).
- 682 30 Jenior, M. L., Leslie, J. L., Young, V. B. & Schloss, P. D. *Clostridium difficile*  
683 Colonizes Alternative Nutrient Niches during Infection across Distinct Murine Gut  
684 Microbiomes. *mSystems* **2**, doi:10.1128/mSystems.00063-17 (2017).
- 685 31 Kopke, M., Straub, M. & Durre, P. *Clostridium difficile* is an autotrophic bacterial  
686 pathogen. *PLoS One* **8**, e62157, doi:10.1371/journal.pone.0062157 (2013).
- 687 32 Karlsson, S., Lindberg, A., Norin, E., Burman, L. G. & Akerlund, T. Toxins, butyric  
688 acid, and other short-chain fatty acids are coordinately expressed and down-  
689 regulated by cysteine in *Clostridium difficile*. *Infection and Immunity* **68**, 5881-  
690 5888 (2000).
- 691 33 Hryckowian, A. J., Pruss, K. M. & Sonnenburg, J. L. The emerging metabolic  
692 view of *Clostridium difficile* pathogenesis. *Current Opinion in Microbiology* **35**, 42-  
693 47, doi:10.1016/j.mib.2016.11.006 (2017).

- 694 34 Sonnenburg, E. D. & Sonnenburg, J. L. Starving our microbial self: the  
695 deleterious consequences of a diet deficient in microbiota-accessible  
696 carbohydrates. *Cell Metabolism* **20**, 779-786, doi:10.1016/j.cmet.2014.07.003  
697 (2014).
- 698 35 Carmody, R. N. *et al.* Diet dominates host genotype in shaping the murine gut  
699 microbiota. *Cell Host & Microbe* **17**, 72-84, doi:10.1016/j.chom.2014.11.010  
700 (2015).
- 701 36 Rabbani, G. H. *et al.* Green banana reduces clinical severity of childhood  
702 shigellosis: a double-blind, randomized, controlled clinical trial. *The Pediatric*  
703 *infectious disease journal* **28**, 420-425, doi:10.1097/INF.0b013e31819510b5  
704 (2009).
- 705 37 Alvarez-Acosta, T. *et al.* Beneficial role of green plantain [*Musa paradisiaca*] in  
706 the management of persistent diarrhea: a prospective randomized trial. *Journal*  
707 *of the American College of Nutrition* **28**, 169-176 (2009).
- 708 38 Desai, M. S. *et al.* A Dietary Fiber-Deprived Gut Microbiota Degrades the Colonic  
709 Mucus Barrier and Enhances Pathogen Susceptibility. *Cell* **167**, 1339-1353  
710 e1321, doi:10.1016/j.cell.2016.10.043 (2016).
- 711 39 Sebailhia, M. *et al.* The multidrug-resistant human pathogen *Clostridium difficile*  
712 has a highly mobile, mosaic genome. *Nature Genetics* **38**, 779-786,  
713 doi:10.1038/ng1830 (2006).
- 714 40 Cartman, S. T. & Minton, N. P. A mariner-based transposon system for in vivo  
715 random mutagenesis of *Clostridium difficile*. *Applied and Environmental*  
716 *Microbiology* **76**, 1103-1109, doi:10.1128/aem.02525-09 (2010).
- 717 41 Kashyap, P. C. *et al.* Complex interactions among diet, gastrointestinal transit,  
718 and gut microbiota in humanized mice. *Gastroenterology* **144**, 967-977,  
719 doi:10.1053/j.gastro.2013.01.047 (2013).
- 720 42 Sonnenburg, E. D. *et al.* Diet-induced extinctions in the gut microbiota compound  
721 over generations. *Nature* **529**, 212-215, doi:10.1038/nature16504 (2016).
- 722 43 Turnbaugh, P. J. *et al.* The effect of diet on the human gut microbiome: a  
723 metagenomic analysis in humanized gnotobiotic mice. *Science Translational*  
724 *Medicine* **1**, 6ra14, doi:10.1126/scitranslmed.3000322 (2009).
- 725 44 Etienne-Mesmin, L. *et al.* Toxin-positive *Clostridium difficile* latently infect mouse  
726 colonies and protect against highly pathogenic *C. difficile*. *Gut*,  
727 doi:10.1136/gutjnl-2016-313510 (2017).
- 728 45 Sonnenburg, E. D. *et al.* Specificity of polysaccharide use in intestinal  
729 bacteroides species determines diet-induced microbiota alterations. *Cell* **141**,  
730 1241-1252 (2010)
- 731 46 Bachmanov, A. A., Reed, D. R., Beauchamp, G. K. & Tordoff, M. G. Food intake,  
732 water intake, and drinking spout side preference of 28 mouse strains. *Behavior*  
733 *Genetics* **32**, 435-443 (2002).
- 734 47 Gopinath, S., Lichtman, J. S., Bouley, D. M., Elias, J. E. & Monack, D. M. Role of  
735 disease-associated tolerance in infectious superspreaders. *Proceedings of the*  
736 *National Academy of Sciences of the United States of America* **111**, 15780-  
737 15785, doi:10.1073/pnas.1409968111 (2014).
- 738 48 Caporaso, J. G. *et al.* Ultra-high-throughput microbial community analysis on the  
739 Illumina HiSeq and MiSeq platforms. *The ISME Journal* **6**, 1621-1624,  
740 doi:10.1038/ismej.2012.8 (2012).
- 741 49 Caporaso, J. G. *et al.* QIIME allows analysis of high-throughput community  
742 sequencing data. *Nature Methods* **7**, 335-336, doi:10.1038/nmeth.f.303 (2010).
- 743 50 Edgar, R. C. Search and clustering orders of magnitude faster than BLAST.  
744 *Bioinformatics* **26**, 2460-2461, doi:10.1093/bioinformatics/btq461 (2010).

- 745 51 Caporaso, J. G. *et al.* PyNAST: a flexible tool for aligning sequences to a  
746 template alignment. *Bioinformatics* **26**, 266-267,  
747 doi:10.1093/bioinformatics/btp636 (2010).  
748 52 McDonald, D. *et al.* An improved Greengenes taxonomy with explicit ranks for  
749 ecological and evolutionary analyses of bacteria and archaea. *The ISME Journal*  
750 **6**, 610-618, doi:10.1038/ismej.2011.139 (2012).  
751
